# Supplementary material
Source: ML conference proceedings conference paper supplement (https://proceedings.neurips.cc/paper_files/paper/2018/hash/f8e59f4b2fe7c5705bf878bbd494ccdf-Abstract.html)
Supplement: Supplementary file [file f8e59f4b2fe7c5705bf878bbd494ccdf-Supplemental.zip]

## A Additional Background

### A.1 Additional Examples

We list some examples of popular submodular functions in Table 1.

| Problem                                                                                                       | Submodular function, $S \subseteq E$ (unless specified)                                           |
|---------------------------------------------------------------------------------------------------------------|---------------------------------------------------------------------------------------------------|
| n experts (simplex), $E = \{1, \dots, n\}$                                                                    | $f(S) = 1$                                                                                        |
| k out of n experts (k-simplex), $E = \{1, \dots, n\}$                                                         | $f(S) = \min\{ S , k\}$                                                                           |
| Permutations over $E = \{1, \dots, n\}$                                                                       | $f(S) = \sum_{s=1}^{ S } (n+1-s)$                                                                 |
| k-truncated permutations over $E = \{1, \dots, n\}$                                                           | $f(S) = (n-k) S $ for $ S  \leq k$ , $f(S) = k(n-k) + \sum_{s=k+1}^{ S } (n+1-s)$ if $ S  \geq k$ |
| Spanning trees on $G = (V, E)$                                                                                | $f(S) =  V(S)  - \kappa(S)$ , $\kappa(S)$ is the number of connected components of $S$            |
| Matroids over ground set $E$ : $M = (E, (\mathcal{I}))$ , $(\mathcal{I}) \subseteq 2^E$                       | $f(S) = r_M(S)$ , the rank function of the matroid                                                |
| Coverage of T: given $T_1, \dots, T_n \subseteq T$                                                            | $f(S) =  \bigcup_{i \in S} T_i $ , $E = \{1, \dots, n\}$                                          |
| Cut functions on a directed graph $D = (V, E)$ , $c : E \rightarrow \mathbb{R}_+$                             | $f(S) = c(\delta^{out}(S))$ , $S \subseteq V$                                                     |
| Flows into a sink vertex $t$ , given a directed graph $D = (V, E)$ and costs $c : E \rightarrow \mathbb{R}_+$ | $f(S) = \max \text{ flow from } S \subseteq V \setminus \{t\} \text{ into } t$                    |
| Maximal elements in $E$ , $h : E \rightarrow \mathbb{R}$                                                      | $f(S) = \max_{e \in S} h(e)$ , $f(\emptyset) = \min_{e \in E} h(e)$                               |
| Entropy $H$ of random variables $X_1, \dots, X_n$                                                             | $f(S) = H(\bigcup_{i \in S} X_i)$ , $E = \{1, \dots, n\}$                                         |

Table 1: Problems and the submodular functions (on ground set of elements  $E$ ) that give rise to them.

### A.2 Strong Convexity and Smoothness

We say a function  $g : \mathbb{R}^n \rightarrow \mathbb{R}$  is  $\alpha$ -strongly convex if  $g(x) - \alpha/2\|x\|^2$  is convex, where  $\alpha > 0$ . It is easy to see that the sum of a strongly convex function and a piecewise linear function is still strongly convex, and we have

**Lemma 3.** *When  $g : \mathbb{R}^n \rightarrow \mathbb{R}$  is a strongly convex function, then*

$$\text{minimize } g(x) + \max_{w \in \text{conv}(\mathcal{V})} w^\top x \quad (P_{\mathcal{V}})$$

*has a unique optimal solution  $x^*$  for all  $\mathcal{V} \subseteq \mathbb{R}^n$ .*

On the other hand, we say a function  $g : \mathbb{R}^n \rightarrow \mathbb{R}$  is  $\beta$ -smooth if there exists  $\beta > 0$  such that  $g(x) - \beta/2\|x\|^2$  is concave. We have[21]:

**Lemma 4.** *When a function  $g$  is  $\alpha$ -strongly convex, its Fenchel conjugate  $g^*$  is  $\frac{1}{\alpha}$ -smooth.*

**Lemma 5.** *When a function  $g$  is  $\beta$ -smooth, its Fenchel conjugate  $g^*$  is  $\frac{1}{\beta}$ -strongly convex.*

## B The Original Simplicial Method (Section 3)

We present the Original Simplicial Method (OSM) in Algorithm 3.

## C Limited Memory Kelley's Method (Section 3)

In this section, we provide proofs of some of the results in Section 3.

**Proof of Theorem 1.**

*Proof.* We prove this by induction. The claim is true for  $i = 0$  since  $\mathcal{V}^{(0)}$  has only one element. Suppose that the claim is true for  $i < i_0$ . When  $\Delta > \epsilon$ , we have  $v^{(i_0)\top} x^{(i_0)} = f(x^{(i_0)}) > f_{(i_0)}(x^{(i_0)})$ . From  $\mathcal{A}^{(i_0)} \subseteq \{w \in \mathbb{R}^n \mid w^\top x^{(i_0)} = f_{(i_0)}(x^{(i_0)})\}$  we have  $v^{(i_0)} \notin \text{affine}(\mathcal{A}^{(i_0)})$ . Otherwise when  $\Delta^{(i)} \leq \epsilon$ , the algorithm terminates in the  $i_0$ th iteration.

Since vectors in  $\mathcal{V}^{(i)}$  are affinely independent, we have  $|\mathcal{V}^{(i)}| \leq n+1$  for all  $i$  since  $\mathcal{V}^{(i)} \subseteq \mathbb{R}^n$ .  $\square$

Before proving Lemma 1, we first present a lemma that is used in the proof of Lemma 1:

---

**Algorithm 3** OSM: The Original Simplicial Method for (P)

---

**Require:** strongly convex function  $g : \mathbb{R}^n \rightarrow \mathbb{R}$ , submodular function  $F : 2^n \rightarrow \mathbb{R}$ , tolerance  $\epsilon > 0$

**Ensure:**  $\epsilon$ -suboptimal solution  $x^\sharp$

- 1: initialize: choose  $x^{(0)} \in \mathbb{R}^n$ , set  $\mathcal{V}^{(0)} = \emptyset$
- 2: **for**  $i = 1, 2, \dots$  **do**
- 3:     **Convex subproblem.** Define approximation  $f_{(i)}(x) = \max\{w^\top x : w \in \mathcal{V}^{(i-1)}\}$  and solve

$$x^{(i)} = \operatorname{argmin} g(x) + f_{(i)}(x).$$

- 4:     **Submodular subproblem.** Compute value and subgradient of  $f$  at  $x^{(i)}$

$$f(x^{(i)}) = \max_{w \in B(F)} w^\top x^{(i)}, \quad v^{(i)} \in \partial f(x^{(i)}) = \operatorname{argmax}_{w \in B(F)} w^\top x^{(i)}.$$

- 5:     **Stopping condition.** Break if duality gap  $p^{(i)} - d^{(i)} \leq \epsilon$ , where

$$p^{(i)} = g(x^{(i)}) + f(x^{(i)}), \quad d^{(i)} = g(x^{(i)}) + f_{(i)}(x^{(i)}).$$

- 6:     **Update memory.** Update memory  $\mathcal{V}^{(i)}$ :

$$\mathcal{V}^{(i)} = \mathcal{V}^{(i-1)} \cup \{v^{(i)}\}.$$

- 7: **return**  $x^{(i)}$
- 

**Lemma 6.** Given a submodular function  $F : 2^V \rightarrow \mathbb{R}$ , let  $\mathcal{W} \subseteq \operatorname{vert}(B(F))$  be a subset of the vertices of its base polytope. For the piecewise linear function

$$\tilde{f}(x) = \max_{w \in \operatorname{conv}(\mathcal{W})} w^\top x,$$

let  $\mathcal{A}(x) \triangleq \{w^* \in \mathcal{W} \mid w^{*\top} x = \tilde{f}(x)\}$  be the points in  $\mathcal{W}$  that are active at  $x$ . Then given any  $\bar{x} \in \mathbb{R}^n$ , there exists  $\epsilon > 0$  such that

$$\tilde{f}(x) = \max_{w^* \in \operatorname{conv}(\mathcal{A}(\bar{x}))} w^{*\top} x$$

for all  $x \in \mathcal{B}(\bar{x}, \epsilon)$ .

*Proof.* Since  $\mathcal{W}$  is finite, we have  $\tilde{f}(\bar{x}) \geq \max_{\tilde{w} \in \mathcal{W} \setminus \mathcal{A}(\bar{x})} \tilde{w}^\top \bar{x} + \epsilon$ , where  $\epsilon > 0$ . Let  $L = \max_{w \in \mathcal{W}} \|w\|$ , then for all  $x \in \mathcal{B}(\bar{x}, \epsilon/(3L))$ ,  $w^* \in \mathcal{A}(\bar{x})$  and  $\tilde{w} \in \mathcal{W} \setminus \mathcal{A}(\bar{x})$ , we have

$$\begin{aligned} w^{*\top} x - \tilde{w}^\top x &= (w^* - \tilde{w})^\top \bar{x} + w^{*\top} (x - \bar{x}) + \tilde{w}^\top (\bar{x} - x) \\ &\geq \epsilon - L \frac{\epsilon}{3L} - L \frac{\epsilon}{3L} \\ &= \frac{\epsilon}{3}. \end{aligned} \tag{6}$$

Hence  $\tilde{f}(x) > \tilde{w}^\top x$  for all  $x \in \mathcal{B}(\bar{x}, \epsilon/(3L))$  and  $\tilde{w} \in \mathcal{W} \setminus \mathcal{A}(\bar{x})$ , which is equivalent to  $\tilde{f}(x) = \max_{w^* \in \operatorname{conv}(\mathcal{A}(\bar{x}))} w^{*\top} x$  for all  $x \in \mathcal{B}(\bar{x}, \epsilon/(3L))$ .  $\square$

**Proof of Lemma 1.**

*Proof.* Let  $P_{(i)}(x) \triangleq \min g(x) + \max_{w \in \operatorname{conv}(\mathcal{V}^{(i-1)})} w^\top x = g(x) + f_{(i)}(x)$  and  $\tilde{P}_{(i)} \triangleq \min_{x \in \mathbb{R}^n} g(x) + \max_{w \in \operatorname{conv}(\mathcal{A}^{(i)})} w^\top x$ . There exists at least one  $w^* \in \mathcal{V}^{(i-1)}$  such that  $f_{(i)}(x^{(i)}) = w^{*\top} x^{(i)}$ . Therefore,  $P_{(i)}(x^{(i)}) = g(x^{(i)}) + w^{*\top} x^{(i)} = g(x^{(i)}) + \max_{w \in \operatorname{conv}(\mathcal{A}^{(i)})} w^\top x^{(i)} = \tilde{P}_{(i)}(x^{(i)})$ , where the last equality follows from the definition of  $\mathcal{A}^{(i)}$ . Next, if we can show local optimality of  $x^{(i)}$  for  $\tilde{P}_{(i)}$ , this would imply global optimality of  $x^{(i)}$  for  $\tilde{P}_{(i)}$  due to convexity of  $\tilde{P}_{(i)}$ , thus  $P_{(i)}$  and  $\tilde{P}_{(i)}$  will have the same optimal value. By the definition of  $\mathcal{A}^{(i)}$  and Lemma 6, we have  $f(x) = \max_{w \in \operatorname{conv}(\mathcal{A}^{(i)})} w^\top x = f_{(i)}(x)$  in  $\mathcal{B}(x^{(i)}, \epsilon)$  for some  $\epsilon > 0$ . Thus  $P_{(i)}(x^{(i)}) = g(x) + f(x) = g(x) + f_{(i)}(x) = \tilde{P}_{(i)}(x)$  for  $x \in \mathcal{B}(x^{(i)}, \epsilon)$ . Hence  $x^{(i)}$  is a local optimal solution to  $\tilde{P}_{(i)}$ , and the lemma is proved. By Lemma 3,  $x^{(i)}$  is the unique solution to both  $P_{(i)}$  and  $\tilde{P}_{(i)}$ .  $\square$

**Proof of Corollary 1.**

*Proof.* For any  $i \geq 1$ , by Lemma 3, there exists an  $x^{(i)} \in \mathbb{R}^n$  that minimizes  $g(x) + f_{(i)}(x)$ . Thus we have

$$\begin{aligned}
d^{(i)} &= g(x^{(i)}) + f_{(i)}(x^{(i)}) \\
&= g(x^{(i)}) + \max_{w \in \text{conv}(\mathcal{V}^{(i-1)})} w^\top x^{(i)} \\
&\geq g(x^{(i)}) + \max_{w \in \text{conv}(\mathcal{A}^{(i-1)})} w^\top x^{(i)} \quad \triangleright \mathcal{A}^{(i-1)} \subseteq \mathcal{V}^{(i-1)} \quad (7) \\
&> g(x^{(i-1)}) + \max_{w \in \text{conv}(\mathcal{A}^{(i-1)})} w^\top x^{(i-1)} \quad \triangleright \text{optimality and uniqueness of } x^{(i-1)} \\
&= d^{(i-1)}.
\end{aligned}$$

On the other hand, by  $\mathcal{V}^{(i-1)} \subseteq \text{vert}(B(F))$ , we have

$$\begin{aligned}
d^{(i)} &= \min_{x \in \mathbb{R}^n} \{g(x) + \max_{w \in \text{conv}(\mathcal{V}^{(i-1)})} w^\top x\} \\
&\leq \min_{x \in \mathbb{R}^n} \{g(x) + \max_{w \in B(F)} w^\top x\} \quad (8) \\
&= \min_{x \in \mathbb{R}^n} g(x) + f(x)
\end{aligned}$$

for all  $i \geq 0$ .  $\square$

### Proof of Corollary 2.

*Proof.* Note that each  $\mathcal{V}^{(i)}$  determines a unique  $d^{(i)}$ . Suppose for contradiction that there exists  $i_1 \neq i_2$  but  $\mathcal{V}^{(i_1)} = \mathcal{V}^{(i_2)}$ , then we will have  $d^{(i_1)} = d^{(i_2)}$ , which contradicts the fact that  $\{d^{(i)}\}$  strictly increases.  $\square$

### Proof of Theorem 2

*Proof.* Since  $\text{vert}(B(F))$  has finitely many vertices, there are only finitely many choices of  $\mathcal{V}^{(i)} \subseteq \text{vert}(B(F))$ . Thus by Corollary 2, Algorithm 1 terminates within finitely many steps.

Suppose for contradiction that when the algorithm terminates at  $i = i_0$ ,  $p^{(i_0)} - d^{(i_0)} > \epsilon \geq 0$ . Let  $\mathcal{A}^{(i_0)} \triangleq \{w \in \mathcal{V}^{(i_0-1)} : w^\top x^{(i_0)} \triangleq f_{(i_0)}(x^{(i_0)}) \text{ and } v^{(i_0)} \in \mathcal{V}(x^{(i_0)})\}$ . Define  $\mathcal{V}^{(i_0)} \triangleq \mathcal{A}^{(i_0)} \cup \{v^{(i_0)}\}$  and  $f_{(i_0+1)}(x) = \max\{w^\top x : w \in \mathcal{V}^{(i_0)}\}$ , then let  $x^{(i_0+1)} = \arg\min_{x \in \mathbb{R}^n} g(x) + f_{(i_0+1)}(x)$ . By the proof of Corollary 1, we have  $d^{(i_0+1)} = g(x^{(i_0+1)}) + f_{(i_0+1)}(x^{(i_0+1)}) > d^{(i_0)}$ , so  $\mathcal{V}^{(i_0)}$  is different to any  $\mathcal{V}^{(i)}$  where  $i \leq i_0$ , and L-KM should not have terminated at  $i = i_0$ . Thus L-KM would never terminate when  $p^{(i)} - d^{(i)} > \epsilon \geq 0$ .  $\square$

## D Duality (Section 4)

To prove the strong duality between  $(P_V)$  and  $(D_V)$ , we first verify the weak duality:

**Theorem 9** (Weak Duality). *The optimal value of primal problem  $(P_V)$  is greater than or equal to the optimal value of the dual problem  $(D_V)$ .*

*Proof.* We first have

$$\min_{x \in \mathbb{R}^n} \{g(x) + \max_{w \in \text{conv}(\mathcal{V})} w^\top x\} = \min_{x \in \mathbb{R}^n} \max_{w \in \text{conv}(\mathcal{V})} g(x) + w^\top x. \quad (9)$$

For any given  $\tilde{w} \in \text{conv}(\mathcal{V})$ , we also have

$$\min_{x \in \mathbb{R}^n} \max_{w \in \text{conv}(\mathcal{V})} g(x) + w^\top x \geq \min_{x \in \mathbb{R}^n} g(x) + \tilde{w}^\top x. \quad (10)$$

Thus by the definition of  $g^*$ , we can see that

$$\begin{aligned}
\min_{x \in \mathbb{R}^n} \max_{w \in \text{conv}(\mathcal{V})} g(x) + w^\top x &\geq \max_{w \in \text{conv}(\mathcal{V})} \min_{x \in \mathbb{R}^n} g(x) + w^\top x \\
&= \max_{w \in \text{conv}(\mathcal{V})} - \max_{x \in \mathbb{R}^n} (-w)^\top x - g(x) \\
&= \max_{w \in \text{conv}(\mathcal{V})} -g^*(-w). \quad (11)
\end{aligned}$$

Combine (9) and (11), and the theorem follows.  $\square$

### Proof of Theorem 3

*Proof.* By Lemma 3, we know  $(P_V)$  has a unique solution  $\bar{x}$ . Since  $g$  is convex, we have  $\partial g(x) \neq \emptyset$ . By the optimality of  $\bar{x}$ , we also have  $0 \in \partial g(\bar{x}) + \partial f(\bar{x})$ . Let  $\bar{w} \in -\partial g(\bar{x}) \cap \partial f(\bar{x})$ , then

$$g^*(-\bar{w}) = (-\bar{w})^\top \bar{x} - g(\bar{x}) \quad (12)$$

by Eq. (4). Note that  $\bar{w} \in \partial f(\bar{x})$ , we also have  $f(\bar{x}) = \bar{w}^\top \bar{x}$  by Equation (2). Thus

$$f(\bar{x}) + g(\bar{x}) = g^*(\bar{w}), \quad (13)$$

$\bar{w}$  is an optimal solution to  $(D_V)$  and we have  $(P_V)$  and  $(D_V)$  via weak duality.  $\square$

## E Primal-from-dual algorithm (Section 5)

Now consider the *Primal-from-dual* algorithm presented in Section 5.

Formally, assume  $g$  is  $\alpha$ -strongly convex. Suppose we obtain  $w \in B(F)$  with

$$\|w - w^*\| \leq \epsilon$$

via some dual algorithm (e.g., L-FCFW). Define  $x = \nabla_w(-g^*(-w)) = \operatorname{argmin}_x g(x) + w^\top x$ . Since  $g^*$  is  $1/\alpha$  smooth, we have

$$\|x - x^*\| \leq 1/\alpha \|w - w^*\| \leq \epsilon/\alpha$$

Hence if the dual iterates converge linearly, so do the primal iterates.

The remaining difficulty is how to solve the L-FCFW subproblems. One possibility is to use the values and gradients of (a FIRST ORDER ORACLE for)  $h = g^*$ . To implement a first order oracle for  $h = g^*$ , we need only solve an unconstrained minimization problem:

$$g^*(y) = \max_{x \in \mathbb{R}^n} y^\top x - g(x), \quad \nabla g^*(y) = \operatorname{argmax}_{x \in \mathbb{R}^n} y^\top x - g(x).$$

This problem is straightforward to solve since  $g$  is smooth and strongly convex. However, it is not clear how solving these subproblems approximately affects the convergence of L-FCFW. Moreover, we will see in the next section that L-KM achieves exactly the same sequence of iterates as the above (rather unwieldy) proposal.

## F Duality between L-KM and L-FCFW (Section 6)

**Lemma 7.** *Only vertices in  $\mathcal{A}^{(i)}$  can have positive convex multipliers in the convex decomposition of  $w^{(i)}$ , i.e., if we write  $w^{(i)} = \sum_{v \in \mathcal{V}^{(i-1)}} \lambda_v^{(i)} v$  such that  $0 \leq \lambda_v \leq 1$  for any  $v \in \mathcal{V}^{(i-1)}$ , then  $\lambda_v^{(i)} = 0$  for any  $v \in \mathcal{V}^{(i-1)} \setminus \mathcal{A}^{(i)}$ .*

*Proof.* By the definition of  $\mathcal{A}^{(i)}$ , we have

$$\begin{aligned} \operatorname{conv}(\mathcal{A}^{(i)}) &= \operatorname{conv}(\{v \in \mathcal{V}^{(i-1)} \mid v^\top x^{(i)} = w^{(i)\top} x^{(i)}\}) \\ &= \operatorname{conv}(\{v \in \mathcal{V}^{(i-1)} \mid v^\top x^{(i)} = \max_{w \in \operatorname{conv}(\mathcal{V}^{(i-1)})} w^\top x^{(i)}\}) \\ &= \operatorname{argmax}_{w \in \operatorname{conv}(\mathcal{V}^{(i-1)})} w^\top x^{(i)}. \end{aligned} \quad (14)$$

Then

$$\begin{aligned} 0 &= (w^{(i)} - w^{(i)})^\top x^{(i)} \\ &= (w^{(i)} - \sum_{v \in \mathcal{V}^{(i-1)}} \lambda_v^{(i)} v)^\top x^{(i)} \\ &= \sum_{v \in \mathcal{V}^{(i-1)} \setminus \mathcal{A}^{(i)}} \lambda_v^{(i)} [(w^{(i)})^\top x^{(i)} - v^\top x^{(i)}]. \quad \triangleright v^\top x^{(i)} = w^{(i)\top} x^{(i)}, \forall v \in \mathcal{A}^{(i)} \end{aligned} \quad (15)$$

Using (14), we have  $v^\top x^{(i)} - w^{(i)\top} x^{(i)} < 0$  for any  $v \in \mathcal{V}^{(i-1)} \setminus \mathcal{A}^{(i)}$ . Thus  $\lambda_v^{(i)} = 0$  for any  $v \in \mathcal{V}^{(i-1)} \setminus \mathcal{A}^{(i)}$ .  $\square$

**Proof of Theorem 6.**

*Proof.* We prove by induction. When  $i = 1$ ,  $\mathcal{V}^{(0)}$  will naturally refer to the same set of points in L-KM and L-FCFW. By Lemma 3, we have  $x^{(1)}$  is the unique solution to  $g + f_{(1)}$ . Note  $g^*$  is strongly convex given  $g$  is smooth (Lemma 5), we have  $w^{(1)}$  is the unique solution to  $\max_{w \in \text{conv}(\mathcal{V}^{(0)})} -g^*(-w)$ . Let  $\mathcal{V} = \mathcal{V}^{(0)}$  in Theorem 4, we have that  $x^{(1)} = -\nabla g^*(-w^{(1)})$  is the unique minimizer of  $g + f_{(1)}$ . So  $x^{(1)}$  in the two algorithms match. Also note that  $w^{(1)}$  solves  $\max_{w \in \text{conv}(\mathcal{V}^{(0)})} -g^*(-w)$ , we have  $w^{(1)}$  maximizes  $w^\top x^{(1)}$  for all  $w \in \text{conv}(\mathcal{V}^{(i-1)})$  by the first order optimality condition, which gives  $w^{(i)\top} x^{(i)} = f_{(i)}(x^{(i)})$ . Thus  $\mathcal{A}^{(1)}, \mathcal{V}^{(1)}$  match consequently. By strong duality in Theorem 3, we have  $d^{(1)}$  matches in the two algorithms. Note  $g^*$  is strongly convex, which gives the uniqueness of  $w^{(1)}$ . By Theorem 4,  $\nabla g(w^{(1)})$  solves the primal subproblem, so  $x^{(1)}$  match in the two algorithms by the uniqueness of  $x^{(1)}$ .

Suppose that the theorem holds for  $i = i_0$ , in particular, the  $\mathcal{V}^{(i_0)}$  match in the two algorithms. Then for  $i = i_0 + 1$ , we can use the same argument as in the previous paragraph by substituting 0 with  $i_0$  and 1 with  $i_0 + 1$ , and show that all the statements hold for  $i = i_0 + 1$ . Note that by Lemma 7,  $\mathcal{A}^{(i)}$  satisfies the condition in Line 6 of L-FCFW. Thus this theorem is valid.  $\square$

## G Duality between OSM and L-FCFW (Section 6)

**Theorem 10.** *If  $g$  is smooth and strongly convex and in Algorithm 2 we choose  $\mathcal{B}^{(i)} = \mathcal{V}^{(i-1)}$ , then*

1. *The primal iterates  $x^{(i)}$  of Algorithm 3 and Algorithm 2 match.*
2. *The set  $\mathcal{V}^{(i)}$  used at each iteration of Algorithm 3 and Algorithm 2 match.*
3. *The upper and lower bounds  $p^{(i)}$  and  $d^{(i)}$  of Algorithm 3 and Algorithm 2 match.*

The proof of Theorem 10 is similar to the proof of Theorem 6.

## H Definition of Diameter and Pyramid Width

**Diameter.** The diameter of a set  $\mathcal{P} \subseteq \mathbb{R}^n$  is defined as

$$\text{Diam}(\mathcal{P}) \triangleq \max_{v, w \in \mathcal{P}} \|v - w\|_2. \quad (16)$$

**Directional Width.** Given a direction  $x \in \mathbb{R}^n$ , the directional width of a set  $\mathcal{P} \subseteq \mathbb{R}^n$  with respect to  $x$  is defined as

$$\text{dirW}(\mathcal{P}, x) \triangleq \max_{v, w \in \mathcal{P}} (v - w)^\top \frac{x}{\|x\|_2}. \quad (17)$$

Pyramid directional width and pyramid width are defined by Lacoste-Julien and Jaggi in [15] for a finite sets of vectors  $\mathcal{V} \subseteq \mathbb{R}^n$ . Here we extend the definition of pyramid width to a polytope  $\mathcal{P} = \text{conv}(\mathcal{V})$ , and it should be easy to see that the two definitions are essentially the same.

**Pyramid Directional Width.** Let  $\mathcal{V} \subseteq \mathbb{R}^n$  be a finite set of vectors in  $\mathbb{R}^n$ . The pyramid directional width of  $\mathcal{V}$  with respect to a direction  $x$  and a base point  $w \in \text{conv}(\mathcal{V})$  is defined as

$$\text{PdirW}(\mathcal{V}, x, w) \triangleq \min_{A \in \mathcal{A}(w)} \text{dirW}(A \cup \{v(\mathcal{V}, x)\}, x), \quad (18)$$

where  $\mathcal{A}(w) \triangleq \{A \subseteq \mathcal{V} \mid \text{the convex multipliers are non-zero for all } v \in A \text{ in the decomposition of } w\}$  and  $v(\mathcal{V}, x)$  is a vector in  $\arg \max_{v \in \mathcal{V}} v^\top x$ . The pyramid directional width got its name because the set  $A \cup \{v(\mathcal{V}, x)\}$  has the shape of a pyramid with  $A$  being the base and  $v(\mathcal{V}, x)$  being the summit.

**Pyramid Width.** The pyramid width of  $\mathcal{P}$  is defined as

$$\text{PWidth}(\mathcal{P}) \triangleq \min_{\mathcal{K} \in \text{face}(\mathcal{P})} \min_{x \in \text{cone}(\mathcal{K} - w) \setminus \{0\}, w \in \mathcal{K}} \text{PdirW}(\mathcal{K} \cap \text{vert}(\mathcal{P}), x, w), \quad (19)$$

where  $\text{face}(\mathcal{P})$  stands for the faces of  $\mathcal{P}$  and  $\text{cone}(\mathcal{K} - w)$  is equivalent to the set of vectors pointing inwards  $\mathcal{K}$ .
